# Supplementary material for: Structural insights into the unique mechanism of transcription activation by Caulobacter crescentus GcrA
Source: PubMed Central journal article supplement — Nucleic Acids Res. 2018 Mar 5;46(6):3245–56. doi: 10.1093/nar/gky161 (PMC5887438; doi:10.1093/nar/gky161), 2018-03-05

SUPPLEMENTAL MATERIAL

**Structural insights into the unique mechanism of transcription activation by**

***Caulobacter crescentus* GcrA**

Xiaoxian Wu<sup>1,2,†</sup>, Diane L. Haakonsen<sup>3,4,5,†</sup>, Allen G. Sanderlin<sup>4,5</sup>, Yue J. Liu<sup>4,5</sup>,  
Liqiang Shen<sup>1,2</sup>, Ningning Zhuang<sup>1</sup>, Michael T. Laub<sup>4,5,\*</sup>, Yu Zhang<sup>1,\*</sup>

<sup>1</sup>Key Laboratory of Synthetic Biology, Center for Excellence in Molecular Plant Sciences, Shanghai Institute of Plant Physiology and Ecology, Chinese Academy of Sciences, Shanghai 200032, China

<sup>2</sup>University of Chinese Academy of Sciences, Beijing 100049, China

<sup>3</sup>Graduate Program in Microbiology, Massachusetts Institute of Technology, Cambridge, Massachusetts 02139, USA

<sup>4</sup>Department of Biology, Massachusetts Institute of Technology, Cambridge, MA 02139, USA.

<sup>5</sup>Howard Hughes Medical Institute, Massachusetts Institute of Technology, Cambridge, MA 02139, USA.

\*To whom correspondence should be addressed. Tel: +86 (21) 54924352; Email: yzhang@sippe.ac.cn. Correspondence may also be addressed to Michael T. Laub. Tel: +1 (617)324-0418; Email: [laub@mit.edu](mailto:laub@mit.edu).

† These authors contributed equally to this work.

SUPPLEMENTAL TABLES.

Table S1. The statistics for crystal structures of GcrA-SID/ $\sigma^{70}_2$

|                                        | SeMet-<br>GcrA-SID/ $\sigma^{70}_2$ | GcrA-SID/ $\sigma^{70}_2$ |
|----------------------------------------|-------------------------------------|---------------------------|
| <b>Data collection</b>                 |                                     |                           |
| Space group                            | P6 <sub>5</sub> 22                  | P6 <sub>5</sub> 22        |
| Cell dimensions                        |                                     |                           |
| a, b, c (Å)                            | 65.0, 65.0, 387.5                   | 65.2, 65.2, 397.9         |
| $\alpha$ , $\beta$ , $\gamma$ (°)      | 90, 90, 120                         | 90, 90, 120               |
| Resolution (Å)                         | 50.00-3.00 (3.05-3.00)              | 50.00-2.30 (2.34-2.30)    |
| R <sub>sym</sub> or R <sub>merge</sub> | 0.120 (0.631)                       | 0.113 (0.751)             |
| I/ $\sigma$ I                          | 48.5 (8.0)                          | 29.1 (2.8)                |
| Completeness (%)                       | 100 (100)                           | 98.9 (82.0)               |
| Redundancy                             | 35.8 (38.5)                         | 20.2 (14.6)               |
| CC <sub>1/2</sub> in highest shell     | 0.98                                | 0.91                      |
| <b>Refinement</b>                      |                                     |                           |
| Resolution (Å)                         |                                     | 50.00-2.30                |
| No. reflections                        |                                     | 23395                     |
| Rwork/ Rfree                           |                                     | 0.221/0.257               |
| No. of atoms                           |                                     |                           |
| Protein                                |                                     | 2874                      |
| Ligand/ion                             |                                     | 13                        |
| Water                                  |                                     | 182                       |
| B-factors (Å <sup>2</sup> )            |                                     |                           |
| Protein                                |                                     | 38.1                      |
| Ligand/ion                             |                                     | 42.1                      |
| Water                                  |                                     | 39.4                      |
| R.m.s deviations                       |                                     |                           |
| Bond lengths (Å)                       |                                     | 0.008                     |
| Bond angles (°)                        |                                     | 0.947                     |
| Ramachandran plot                      |                                     |                           |
| Favored (%)                            |                                     | 98.4                      |
| Allowed (%)                            |                                     | 1.6                       |
| Disallowed (%)                         |                                     | 0                         |

Numbers in parenthesis are for highest resolution.

Table S2. The statistics for crystal structures of GcrA-DBD, GcrA-DBD/m<sup>6</sup>A-DNA and GcrA-DBD/DNA

|                                        | GcrA-DBD*                                     | GcrA-DBD/m <sup>6</sup> A-DNA<br>(crystal form 1) | GcrA-DBD/m <sup>6</sup> A-DNA<br>(crystal form 2) | GcrA-DBD/DNA<br>(crystal form 2) |
|----------------------------------------|-----------------------------------------------|---------------------------------------------------|---------------------------------------------------|----------------------------------|
| Data collection                        |                                               |                                                   |                                                   |                                  |
| Space group                            | P2 <sub>1</sub> 2 <sub>1</sub> 2 <sub>1</sub> | C222                                              | C222 <sub>1</sub>                                 | C222 <sub>1</sub>                |
| Cell dimensions                        |                                               |                                                   |                                                   |                                  |
| a, b, c (Å)                            | 30.4, 37.1, 40.8                              | 124.0, 131.7, 77.7                                | 49.8, 63.7, 126.7                                 | 49.9, 64.9, 126.5                |
| α, β, γ (°)                            | 90, 90, 90                                    | 90, 90, 90                                        | 90, 90, 90                                        | 90, 90, 90                       |
| Resolution (Å)                         | 50.00-1.42(1.50-1.42)                         | 50.00-2.90(2.95-2.90)                             | 50.00-1.55(1.58-1.55)                             | 50.00-1.60(1.63-1.60)            |
| R <sub>sym</sub> or R <sub>merge</sub> | 0.08 (0.12)                                   | 0.107 (>1)                                        | 0.067 (0.742)                                     | 0.081 (0.934)                    |
| I/σI                                   | 20.9 (14.9)                                   | 12.4 (1.1)                                        | 22.5 (2.5)                                        | 22.1 (2.1)                       |
| Completeness (%)                       | 99.9 (99.6)                                   | 94.3 (92.2)                                       | 99.6 (99.9)                                       | 99.6(100)                        |
| Redundancy                             | 6.2 (6.1)                                     | 4.8 (3.6)                                         | 7.2 (6.9)                                         | 7.2 (7.0)                        |
| CC <sub>1/2</sub> in highest shell     | 0.98                                          | 0.49                                              | 0.78                                              | 0.92                             |
| Refinement                             |                                               |                                                   |                                                   |                                  |
| Resolution (Å)                         | 50.00-1.40                                    | 50.00-2.90                                        | 50.00-1.55                                        | 50.00-1.60                       |
| No. reflections                        | 9146                                          | 11348                                             | 29459                                             | 27251                            |
| Rwork/ Rfree                           | 0.183/0.211                                   | 0.201/0.242                                       | 0.205/0.230                                       | 0.200/0.224                      |
| No. of atoms                           |                                               |                                                   |                                                   |                                  |
| Protein                                | 388                                           | 1385                                              | 1040                                              | 1025                             |
| Ligand/ion                             | 0                                             | 1416                                              | 434                                               | 432                              |
| Water                                  | 50                                            | 2                                                 | 119                                               | 173                              |
| B-factors (Å <sup>2</sup> )            |                                               |                                                   |                                                   |                                  |
| Protein                                | 12.3                                          | 52.6                                              | 28.2                                              | 33.7                             |
| Ligand/ion                             | 0                                             | 46.5                                              | 25.4                                              | 30.3                             |
| Water                                  | 21.2                                          | 18.3                                              | 32.6                                              | 44.2                             |
| R.m.s deviations                       |                                               |                                                   |                                                   |                                  |
| Bond lengths (Å)                       | 0.005                                         | 0.004                                             | 0.018                                             | 0.007                            |
| Bond angles (°)                        | 0.908                                         | 0.728                                             | 1.95                                              | 0.963                            |
| Ramachandran plot                      |                                               |                                                   |                                                   |                                  |
| Favored (%)                            | 100                                           | 97.7                                              | 96.9                                              | 100                              |
| Allowed (%)                            | 0                                             | 2.3                                               | 3.1                                               | 0                                |
| Disallowed (%)                         | 0                                             | 0                                                 | 0                                                 | 0                                |

Numbers in parenthesis are for highest resolution.

\* Due to detector limitation, the GcrA-DBD dataset was cut at 1.55 Å although the signals at the highest shell are very strong

**Table S3. Constructs used in this study.**

| <b>Constructs</b>                            | <b>Description</b>                                                                       | <b>Source</b> |
|----------------------------------------------|------------------------------------------------------------------------------------------|---------------|
| pET28a-TEV- <i>gcrA</i> (1-45)               | Expression vector for HIS <sub>6</sub> -GcrA-DBD (1-45)                                  | This study    |
| pTOLO-EX5- <i>gcrA</i> (88-173)              | Expression vector for SUMO-GcrA-SID (88-173)                                             | This study    |
| pET28a-TEV- <i>gcrA</i> (1-173)              | Expression vector for HIS <sub>6</sub> -GcrA (1-173)                                     | This study    |
| pET28b- $\sigma^{70}$                        | Expression vector for $Cc\sigma^{70}$                                                    | This study    |
| pET28b- $\sigma^{70}$ (K273C)                | Expression vector for $Cc\sigma^{70}$ (K273C)                                            | This study    |
| pET28a-TEV- $\sigma^{70}_2$ (128-487)        | Expression vector for HIS <sub>6</sub> - $Cc\sigma^{70}_2$ (128-487)                     | This study    |
| pEASY- <i>mipZ</i> -tR2                      | Template vector for <i>mipZ</i> promoter                                                 | This study    |
| pEASY- <i>CCNA-00157</i> -tR2                | Template vector for <i>CCNA-00157</i> promoter                                           | This study    |
| P <sub><i>xyi</i></sub> - <i>gcrA</i>        | Expression vector for WT GcrA                                                            | This study    |
| P <sub><i>xyi</i></sub> - <i>gcrA</i> (R33W) | Expression vector for GcrA(R33W)                                                         | This study    |
| P <sub><i>xyi</i></sub> - <i>gcrA</i> (I37E) | Expression vector for GcrA(I37E)                                                         | This study    |
| P <sub><i>xyi</i></sub> - <i>gcrA</i> (I37W) | Expression vector for GcrA(I37W)                                                         | This study    |
| P <sub><i>xyi</i></sub> - <i>gcrA</i> (G38F) | Expression vector for GcrA(G38F)                                                         | This study    |
| P <sub><i>xyi</i></sub> - <i>gcrA</i> (G38Y) | Expression vector for GcrA(G38Y)                                                         | This study    |
| P <sub><i>xyi</i></sub> - <i>gcrA</i> (G38W) | Expression vector for GcrA(G38W)                                                         | This study    |
| pENTR- <i>gcrA</i>                           | Template vector for pENTR- <i>gcrA</i> mutants and P <sub><i>xyi</i></sub> - <i>gcrA</i> | This study    |
| pENTR- <i>gcrA</i> (W3A)                     | Template vector for P <sub><i>xyi</i></sub> - <i>gcrA</i> (W3A)                          | This study    |
| pENTR- <i>gcrA</i> (W15A)                    | Template vector for P <sub><i>xyi</i></sub> - <i>gcrA</i> (W15A)                         | This study    |
| pENTR- <i>gcrA</i> (S20A)                    | Template vector for P <sub><i>xyi</i></sub> - <i>gcrA</i> (S20A)                         | This study    |
| pENTR- <i>gcrA</i> (S22A)                    | Template vector for P <sub><i>xyi</i></sub> - <i>gcrA</i> (S22A)                         | This study    |
| pENTR- <i>gcrA</i> (R33A)                    | Template vector for P <sub><i>xyi</i></sub> - <i>gcrA</i> (R33A)                         | This study    |
| pENTR- <i>gcrA</i> (R33W)                    | Template vector for P <sub><i>xyi</i></sub> - <i>gcrA</i> (R33W)                         | This study    |
| pENTR- <i>gcrA</i> (N34A)                    | Template vector for P <sub><i>xyi</i></sub> - <i>gcrA</i> (N34A)                         | This study    |
| pENTR- <i>gcrA</i> (I37A)                    | Template vector for P <sub><i>xyi</i></sub> - <i>gcrA</i> (I37A)                         | This study    |
| pENTR- <i>gcrA</i> (I37E)                    | Template vector for P <sub><i>xyi</i></sub> - <i>gcrA</i> (I37E)                         | This study    |
| pENTR- <i>gcrA</i> (I37W)                    | Template vector for P <sub><i>xyi</i></sub> - <i>gcrA</i> (I37W)                         | This study    |
| pENTR- <i>gcrA</i> (G38F)                    | Template vector for P <sub><i>xyi</i></sub> - <i>gcrA</i> (G38F)                         | This study    |
| pENTR- <i>gcrA</i> (G38Y)                    | Template vector for P <sub><i>xyi</i></sub> - <i>gcrA</i> (G38Y)                         | This study    |
| pENTR- <i>gcrA</i> (G38W)                    | Template vector for P <sub><i>xyi</i></sub> - <i>gcrA</i> (G38W)                         | This study    |
| pENTR- <i>gcrA</i> (K39A)                    | Template vector for P <sub><i>xyi</i></sub> - <i>gcrA</i> (K39A)                         | This study    |



|                                 |                                                                     |                                  |
|---------------------------------|---------------------------------------------------------------------|----------------------------------|
| pENTR- <i>gcrA</i> (H41A)       | Template vector for P <sub>xyI</sub> - <i>gcrA</i> (H41A)           | This study                       |
| pENTR- <i>gcrA</i> (R42A)       | Template vector for P <sub>xyI</sub> - <i>gcrA</i> (R42A)           | This study                       |
| pENTR- <i>gcrA</i> (R42A, R33A) | Template vector for P <sub>xyI</sub> - <i>gcrA</i> (R42A, R33A)     | This study                       |
| pENTR- <i>gcrA</i> (K39A, R42A) | Template vector for P <sub>xyI</sub> - <i>gcrA</i> (K39A, R42A)     | This study                       |
| pENTR- <i>gcrA</i> (N34A, I37A) | Template vector for P <sub>xyI</sub> - <i>gcrA</i> (N34A, I37A)     | This study                       |
| pENTR- <i>gcrA</i> (R33W)       | Template vector for P <sub>xyI</sub> - <i>gcrA</i> (R33W)           | This study                       |
| pENTR- <i>gcrA</i> (I37E)       | Template vector for P <sub>xyI</sub> - <i>gcrA</i> (I37E)           | This study                       |
| pENTR- <i>gcrA</i> (I37W)       | Template vector for P <sub>xyI</sub> - <i>gcrA</i> (I37W)           | This study                       |
| pENTR- <i>gcrA</i> (G38F)       | Template vector for P <sub>xyI</sub> - <i>gcrA</i> (G38F)           | This study                       |
| pENTR- <i>gcrA</i> (G38Y)       | Template vector for P <sub>xyI</sub> - <i>gcrA</i> (G38Y)           | This study                       |
| pENTR- <i>gcrA</i> (G38W)       | Template vector for P <sub>xyI</sub> - <i>gcrA</i> (G38W)           | This study                       |
| pMT375 (pRXMCS-5)               | Low-copy vector for xylose-inducible expression (tet <sup>R</sup> ) | Thanbichler <i>et al.</i> , 2007 |
| pMT375- <i>gcrA</i>             | Xylose inducible expression of GcrA                                 | Haakonsen <i>et al.</i> , 2015   |
| pMT375- <i>gcrA</i> (W3A)       | Xylose inducible expression of GcrA(W3A)                            | This study                       |
| pMT375- <i>gcrA</i> (W15A)      | Xylose inducible expression of GcrA(W15A)                           | This study                       |
| pMT375- <i>gcrA</i> (S20A)      | Xylose inducible expression of GcrA(S20A)                           | This study                       |
| pMT375- <i>gcrA</i> (S22A)      | Xylose inducible expression of GcrA(S22A)                           | This study                       |
| pMT375- <i>gcrA</i> (R33A)      | Xylose inducible expression of GcrA(R33A)                           | This study                       |
| pMT375- <i>gcrA</i> (N34A)      | Xylose inducible expression of GcrA(N34A)                           | This study                       |
| pMT375- <i>gcrA</i> (I37A)      | Xylose inducible expression of GcrA(I37A)                           | This study                       |
| pMT375- <i>gcrA</i> (K39A)      | Xylose inducible expression of GcrA(K39A)                           | This study                       |
| pMT375- <i>gcrA</i> (H41A)      | Xylose inducible expression of GcrA(H41A)                           | This study                       |
| pMT375- <i>gcrA</i> (R42A)      | Xylose inducible expression of GcrA(R42A)                           | This study                       |
| pMT375- <i>gcrA</i> (R42A,R33A) | Xylose inducible expression of GcrA(R42A,R33A)                      | This study                       |
| pMT375- <i>gcrA</i> (K39A,R42A) | Xylose inducible expression of GcrA(K39A,R42A)                      | This study                       |
| pMT375- <i>gcrA</i> (N34A,I37A) | Xylose inducible expression of GcrA(N34A,I37A)                      | This study                       |
| pMT375- <i>gcrA</i> (R33W)      | Xylose inducible expression of GcrA(R33W)                           | This study                       |
| pMT375- <i>gcrA</i> (I37E)      | Xylose inducible expression of GcrA(I37E)                           | This study                       |

|                                   |                                            |                        |
|-----------------------------------|--------------------------------------------|------------------------|
| pMT375- <i>gcrA</i> (I37W)        | Xylose inducible expression of GerA (I37W) | This study             |
| pMT375- <i>gcrA</i> (G38F)        | Xylose inducible expression of GerA (G38F) | This study             |
| pMT375- <i>gcrA</i> (G38Y)        | Xylose inducible expression of GerA (G38Y) | This study             |
| pMT375- <i>gcrA</i> (G38W)        | Xylose inducible expression of GerA (G38W) | This study             |
| pKNT25- $\sigma^{70}$             | $\sigma^{70}$ -T25                         | Haakonsen et al., 2015 |
| pKNT25- $\sigma^{70}$ (L128A)     | $\sigma^{70}$ (L128A)-T25                  | This study             |
| pKNT25- $\sigma^{70}$ (L129A)     | $\sigma^{70}$ (L129A)-T25                  | This study             |
| pKNT25- $\sigma^{70}$ (G133E)     | $\sigma^{70}$ (G133E)-T25                  | This study             |
| pKNT25- $\sigma^{70}$ (A136E)     | $\sigma^{70}$ (A136E)-T25                  | This study             |
| pKNT25- $\sigma^{70}$ (K139A)     | $\sigma^{70}$ (K139A)-T25                  | This study             |
| pKNT25- $\sigma^{70}$ (R140A)     | $\sigma^{70}$ (R140A)-T25                  | This study             |
| pKNT25- $\sigma^{70}$ (A143E)     | $\sigma^{70}$ (A143E)-T25                  | This study             |
| pKNT25- $\sigma^{70}$ (E411A)     | $\sigma^{70}$ (E411A)-T25                  | This study             |
| pKNT25- $\sigma^{70}$ (R462A)     | $\sigma^{70}$ (R462A)-T25                  | This study             |
| pUT18- <i>gcrA</i>                | GcrA-T18                                   | Haakonsen et al., 2015 |
| pUT18- <i>gcrA</i> (C118A)        | GcrA(C118A)-T18                            | This study             |
| pUT18- <i>gcrA</i> (K119A)        | GcrA(K119A)-T18                            | This study             |
| pUT18- <i>gcrA</i> (W120A)        | GcrA(W120A)-T18                            | This study             |
| pUT18- <i>gcrA</i> (K119A,W120A)  | GcrA(K119A,W120A)-T18                      | This study             |
| pUT18- <i>gcrA</i> (D124A)        | GcrA(D124A)-T18                            | This study             |
| pUT18- <i>gcrA</i> (G129D)        | GcrA(G129D)-T18                            | This study             |
| pUT18- <i>gcrA</i> (F130A)        | GcrA(F130A)-T18                            | This study             |
| pUT18- <i>gcrA</i> (F132A)        | GcrA(F132A)-T18                            | This study             |
| pUT18- <i>gcrA</i> (F130A,F132A)  | GcrA(F130A,F132A)-T18                      | This study             |
| pUT18- <i>gcrA</i> (Y142A)        | GcrA(Y142A)-T18                            | This study             |
| pUT18- <i>gcrA</i> (C143A)        | GcrA(C143A)-T18                            | This study             |
| pUT18- <i>gcrA</i> (Y142A ,C143A) | GcrA(Y142A ,C143A)-T18                     | This study             |

---

|                                   |                                                                                          |                                |
|-----------------------------------|------------------------------------------------------------------------------------------|--------------------------------|
| pUT18- <i>gcrA</i> (H146A)        | GerA(H146A)-T18                                                                          | This study                     |
| pUT18- <i>gcrA</i> (C143A,H146A)  | GerA(C143A,H146A)-T18                                                                    | This study                     |
| pUT18- <i>gcrA</i> (Y151A)        | GerA(Y151A)-T18                                                                          | This study                     |
| pUT18- <i>gcrA</i> (Q152A)        | GerA(Q152A)-T18                                                                          | This study                     |
| pUT18- <i>gcrA</i> (Y151A, Q152A) | GerA(Y151A, Q152A)-T18                                                                   | This study                     |
| pUT18- <i>gcrA</i> (K158A, K159A) | GerA(K158A, K159A)-T18                                                                   | This study                     |
| pET28b-GcrA                       | Expression vector for purification of HIS <sub>6</sub> -GcrA (Fig 5.A)                   | Haakonsen <i>et al.</i> , 2015 |
| pET28b-GcrA(1-107)                | Expression vector for purification of HIS <sub>6</sub> -GcrA <sub>1-107</sub> (Fig 5.A)  | This study                     |
| pET28b-GcrA(51-173)               | Expression vector for purification of HIS <sub>6</sub> -GcrA <sub>51-173</sub> (Fig 5.A) | This study                     |
| pET28b-CcrM                       | Expression vector for purification of HIS <sub>6</sub> -CcrM                             | Haakonsen <i>et al.</i> , 2015 |

---

**Table S4. Primers used in this study.**

| Constructs                            | Sequences(5'→3')                                                                                                         |
|---------------------------------------|--------------------------------------------------------------------------------------------------------------------------|
| pET28a-TEV- <i>gcrA</i> (1-45)        | F: CCATGGATATGAGCTGGACCGACGAA<br>R: GAATTCCTTACAGGCCAGACGGTGC                                                            |
| pTOLO-EX5- <i>gcrA</i> (88-173)       | F: AAAACCTGTATTTTCAGGGCGCCATGGATGTTCCGGTCCGCCG<br>R: TGGTGGTGGTGGTCTCGAGACTGCAGTTAGATGTAGCGGCGAAGC                       |
| pET28a-TEV- <i>gcrA</i> (1-173)       | F: CCATGGATATGAGCTGGACCGACGAA<br>R: GAATTCCTTAGATGTAGCGGCGAAGC                                                           |
| pET28b- $\sigma^{70}$                 | F: AGATCATATGTTGATGAGCAACAATTCCTCGGCC<br>R: AGATAAGCTTTTACGAGTCCAGGAAGCTGCGCAG                                           |
| pET28b- $\sigma^{70}$ (K273C)         | F: GTCGGCAGCCGCCTGTGCGGCGAGGACC<br>R: GCACAGGCGGCTGCCGACCAGCTTGTCT                                                       |
| pET21a-TEV- $\sigma^{70}_2$ (112-487) | F: ATATGCATCACCATCACCATCAGATTACGATATCCCAACGACCGAAA<br>ACCTGTATTTTCAGGGCACCAGACCGCCGGTG<br>R: GAATTCCTTAAGCCTGGTCCGGCGATC |
| pET21a-TEV- $\sigma^{70}_2$ (128-487) | F: CATATGCATCACCATCACCATCAGATTACGATATCCCAACGACCGAAAA<br>CCTGTATTTTCAGGGCCTGTCTCGCGCGAA<br>R: GAATTCCTTAAGCCTGGTCCGGCGATC |
| pEASY- <i>mipZ</i> -tr2               | F: AGGCCCTTAGCCCCCTCGGG<br>R: AAATAAAAAGGCCCTGCGATTACCAGCAGGCCCGCGTTTCGGCCATGGCTC<br>G                                   |
| pEASY- <i>CCNA-00157</i> -tr2         | F: TGACGCCCAGGGCAAGTTGC<br>R:<br>AAATAAAAAGGCCCTGCGATTACCAGCAGGCCGACCGTACATAGTTCAGCT                                     |
| pENTR- <i>gcrA</i>                    | F: CACCATGAGCTGGACCGACGAACG<br>R: TTAGATGTAGCGGCGAAGCG                                                                   |
| $P_{xyr}$ - <i>gcrA</i> and mutants   | F: CGGAATTCCATATGAGCTGGACCGACGAACG<br>R: TGTATCGCTAGCTTAGATGTAGCGGCGAAGCG                                                |
| pENTR- <i>gcrA</i> (W3A)              | F: GCAACCGACGAACGGGTTCCACC<br>R: GTCATGGTGAAGGGGGCGGC                                                                    |
| pENTR- <i>gcrA</i> (W15A)             | F: AAGAAGCTCGCCTTGGACGGCCTTTCGGCCAGCC<br>R: CAGGGTGGAAACCCGTTTCGTCG                                                      |
| pENTR- <i>gcrA</i> (S20A)             | F: GCGGCCAGCCAGATCGCCAAGCAAT<br>R: AAGGCCGTCCAACCAGAGCTTC                                                                |
| pENTR- <i>gcrA</i> (S22A)             | F: TCGGCCGCGCAGATCGCCAAGCAATTGGGC<br>R: AAGGCCGTCCAACCAGAGCTTC                                                           |
| pENTR- <i>gcrA</i> (R33A)             | F: GCCAACGCGGTGATCGGCAAGGTG<br>R: CGTCACGCCGCCAATTGCTTG                                                                  |
| pENTR- <i>gcrA</i> (R33W)             | F: TGGAACGCGGTGATCGGCAAGGTG<br>R: CGTCACGCCGCCAATTGC                                                                     |
| pENTR- <i>gcrA</i> (N34A)             | F: GCCGCGGTGATCGGCAAGGTGCACC<br>R: ACGCGTCACGCCGCCAATTG                                                                  |
| pENTR- <i>gcrA</i> (I37A)             | F: AACGCGGTGGCCGGCAAGGTGCACCGTCTGGGCC<br>R: ACGCGTCACGCCGCCAATTG                                                         |
| pENTR- <i>gcrA</i> (I37E)             | F: GAAGGCAAGGTGCACCGTCTGG<br>R: CACCGCGTTACGCGTCACG                                                                      |
| pENTR- <i>gcrA</i> (I37W)             | F: TGGGGCAAGGTGCACCGTCTGG<br>R: CACCGCGTTACGCGTCACG                                                                      |
| pENTR- <i>gcrA</i> (G38F)             | F: TTCAAGGTGCACCGTCTGGGCCTG<br>R: GATCACCGCGTTACGCGTCAC                                                                  |
| pENTR- <i>gcrA</i> (G38Y)             | F: CGCGGTGATCTATAAGGTGCACCGTCTGGGCCTG<br>R: GGTGCACCTTATAGATCACCGCGTTACGCGTCAC                                           |
| pENTR- <i>gcrA</i> (G38W)             | F: TGGAAGGTGCACCGTCTGGGCCTG<br>R: GATCACCGCGTTACGCGTCAC                                                                  |
| pENTR- <i>gcrA</i> (K39A)             | F: AACGCGGTGATCGGCGCCGTGCACCGTCTGGGCCTGTC<br>R: ACGCGTCACGCCGCCAATTG                                                     |
| pENTR- <i>gcrA</i> (H41A)             | F: AACGCGGTGATCGGCAAGGTGGCCCGTCTGGGCCTGTCGGGCCG<br>R: ACGCGTCACGCCGCCAATTG                                               |
| pENTR- <i>gcrA</i> (R42A)             | F: GCGCTGGGCCTGTCGGGCCGCGC<br>R: GTGCACCTTGCCGATCACCGCG                                                                  |

---

|                                  |                                                                                 |
|----------------------------------|---------------------------------------------------------------------------------|
| pENTR- <i>gcrA</i> (R42A,R33A)   | F: GCGCTGGGCCTGTCGGGCCGCGC<br>R: GTGCACCTTGCCGATCACCGCG                         |
| pENTR- <i>gcrA</i> (N34A,I37A)   | F: GCCGCGGTGGCCGCAAGGTGCACC<br>R: ACGCGTCACGCCCAATTG                            |
| pENTR- <i>gcrA</i> (R33W)        | F: TGGAACGCGGTGATCGGCAAGGTG<br>R: CGTCACGCCGCCAATTG                             |
| pENTR- <i>gcrA</i> (I37E)        | F: GAAGCAAGGTGCACCGTCTGG<br>R: CACCGCGTTACGCGTCACG                              |
| pENTR- <i>gcrA</i> (I37W)        | F: TGGGGCAAGGTGCACCGTCTGG<br>R: CACCGCGTTACGCGTCACG                             |
| pENTR- <i>gcrA</i> (G38F)        | F: TTCAAGGTGCACCGTCTGGGCCTG<br>R: GATCACCGCGTTACGCGTCAC                         |
| pENTR- <i>gcrA</i> (G38Y)        | F: CGCGGTGATCTATAAGGTGCACCGTCTGGGCCTG<br>R: GGTGCACCTTATAGATCACCGCGTTACGCGTCAC  |
| pENTR- <i>gcrA</i> (G38W)        | F: TGGAAGGTGCACCGTCTGGGCCTG<br>R: GATCACCGCGTTACGCGTCAC                         |
| pKNT25- $\sigma^{70}$ (L128A)    | F: GCGCTCTCGCGGAAGGCGAAATCG<br>R: TTCCACCGAGCCATTTTCGCGC                        |
| pKNT25- $\sigma^{70}$ (L129A)    | F: CTGGCGTTCGCGGAAGGCGAAATCGC<br>R: TTCCACCGAGCCATTTTCGCGC                      |
| pKNT25- $\sigma^{70}$ (G133E)    | F: CTGCTCTCGCGGAAGAGGAAATCGCCATCGCCAAGCGCATC<br>R: TTCCACCGAGCCATTTTCGCGC       |
| pKNT25- $\sigma^{70}$ (A136E)    | F: CTGCTCTCGCGGAAGGCGAAATCGAGATCGCCAAGCGCATCGAGGCC<br>R: TTCCACCGAGCCATTTTCGCGC |
| pKNT25- $\sigma^{70}$ (K139A)    | F: GCGCGCATCGAGGCCGCCGCGAC<br>R: GGCGATGGCGATTTTCGCTTCG                         |
| pKNT25- $\sigma^{70}$ (R140A)    | F: AAGCCATCGAGGCCGCCGCGAC<br>R: GGCGATGGCGATTTTCGCTTCG                          |
| pKNT25- $\sigma^{70}$ (A143E)    | F: AAGCGCATCGAGGAGGCCGCCGACACGATGATCCCG<br>R: GGCGATGGCGATTTTCGCTTCG            |
| pKNT25- $\sigma^{70}$ (E411A)    | F: GCGGCCGTCAGGCCAAGAAGGAA<br>R: GCGCTCGCCCTTCTGCACG                            |
| pKNT25- $\sigma^{70}$ (R462A)    | F: GCCCGCGCTACAAGTTCTCGACCTAC<br>R: ATACTCGAACTTATCGACGGCCTTCATC                |
| pUT18- <i>gcrA</i> (C118A)       | F:GCCAAGTGGCCGATCGGCGATCCG<br>R:CATGTGCGCGCCAGGGTCAG                            |
| pUT18- <i>gcrA</i> (K119A)       | F:TGCGCATGGCCGATCGGCGATCCGTC<br>R: CATGTGCGCGCCAGGGTCAG                         |
| pUT18- <i>gcrA</i> (W120A)       | F:TGCAAGGCACCGATCGGCGATCCGTCGTC<br>R: CATGTGCGCGCCAGGGTCAG                      |
| pUT18- <i>gcrA</i> (K119A,W120A) | F:TGCGCCGACCGATCGGCGATCCGTCGTC<br>R: CATGTGCGCGCCAGGGTCAG                       |
| pUT18- <i>gcrA</i> (D124A)       | F:TGCAAGTGGCCGATCGGCGCGCCGTCGTCGGAAGGCTTCACCTTCTGCG<br>R: CATGTGCGCGCCAGGGTCAG  |
| pUT18- <i>gcrA</i> (G129D)       | F:GACTTACCTTCTGCGGTCTGTCGCTC<br>R:TTCCGACGACGGATCGCCGATCG                       |
| pUT18- <i>gcrA</i> (F130A)       | F:GGCGAACCTTCTGCGGTCTGTCGCTCG<br>R: TTCCGACGACGGATCGCCGATCG                     |
| pUT18- <i>gcrA</i> (F132A)       | F:GGCTTACCGCATGCGGTCTGTCGCTCGTTCGGAAGG<br>R: TTCCGACGACGGATCGCCGATCG            |
| pUT18- <i>gcrA</i> (F130A,F132A) | F:GGCGAACCGCATGCGGTCTGTCGCTCGTTCGGAAGG<br>R: TTCCGACGACGGATCGCCGATCG            |
| pUT18- <i>gcrA</i> (Y142A)       | F:GCATGCGTCGAGCACGCGCGGGTG<br>R:GGGGCCTTCCGACGAGCGACGAC                         |
| pUT18- <i>gcrA</i> (C143A)       | F:TATGCAGTCGAGCACGCGCGGGTGGCC<br>R:GGGGCCTTCCGACGAGCGACGAC                      |
| pUT18- <i>gcrA</i> (Y142A,C143A) | F:GCAGCAGTCGAGCACGCGCGGGTGGCC<br>R:GGGGCCTTCCGACGAGCGACGAC                      |
| pUT18- <i>gcrA</i> (H146A)       | F:TATTGCGTCGAGGACGCGGGTGGCCTACCAGCCTC<br>R:GGGGCCTTCCGACGAGCGACGAC              |

---

---

|                                   |                                                                               |
|-----------------------------------|-------------------------------------------------------------------------------|
| pUT18- <i>gcrA</i> (C143A,H146A)  | F: TATGCAGTCGAGGCAGCGCGGGTGGCCTACCAGCCTC<br>R: GGGGCCTTCCGACGAGCGACGAC        |
| pUT18- <i>gcrA</i> (Y151A)        | F: GCACAGCCTCAGCAGACCAAGAAGAAGAGAGC<br>R: GGCCACCCGCGCGTGCTCGAC               |
| pUT18- <i>gcrA</i> (Q152A)        | F:TACGCACCTCAGCAGACCAAGAAGAAGAGCGGC<br>R:GGCCACCCGCGCGTGCTCGAC                |
| pUT18- <i>gcrA</i> (Y151A, Q152A) | F: GCAGCACCTCAGCAGACCAAGAAGAAGAGCGGC<br>R: GGCCACCCGCGCGTGCTCGAC              |
| pUT18- <i>gcrA</i> (K158A, K159A) | F: TACCAGCCTCAGCAGACCAAGGCAGCAAGCGGCGGCCGAAGTGGCC<br>R: GGCCACCCGCGCGTGCTCGAC |
| pET28b-GcrA(1-107)                | F: GATTCATATGAGCTGGACCGACGAACG<br>R: AGATGAGCTCTTACGAGCCGGGTTCTTCGTGACGG      |
| pET28b-GcrA(51-173)               | F: AGATCATATGCCCTCGCAACCGGCCGTCGG<br>R: GTAGGAGCTCTTAGATGTAGCGGCGAAGCG        |

---

## SUPPLEMENTAL FIGURE LEGEND

**Figure S1.** GcrA-SID/ $\sigma^{70}_2$  complex formation. **(A)** The binary complex is separated from individual components on a Superdex S200 column. **(B)** SDS-PAGE results of elution peaks of (A).

**Figure S2.** The structure analysis of GcrA-SID/ $\sigma^{70}_2$  complex. **(A)** The anomalous difference map (red) contoured at  $4\sigma$  show clear signals for 7 out of 7 Se atoms in  $\sigma^{70}_2$ , and the 2Fo-Fc maps (blue) contoured at  $1.0\sigma$  for CcGcrA-SID shows clear density and fitted model. **(B)** The anomalous difference map (red) contoured at  $4\sigma$  shows the presence of a Zn atom, and the 2Fo-Fc map (blue) contoured at  $1.0\sigma$  shows clear density for the coordination residues. The schematics **(C)** and structures **(D)** of *C. crescentus* and *E. coli*  $\sigma^{70}$  factors (PDB: 3UGO). **(E)** Crystal structures of CcGcrA-SID/Cc $\sigma^{70}_2$  complex (left), MtRbpA-SID/Mt $\sigma^{70}_2$  complex (middle; PDB: 4X8K), and superimposition of the two structures. The CR and NCR of Ec $\sigma^{70}$ , black and gray; The CR and NCR of Cc $\sigma^{70}$ , orange and yellow; GcrA, cyan; rbpA, green.

**Figure S3.** The sequence comparison between *C. crescentus*  $\sigma^{70}$  and  $\sigma^{32}$ . **(A)** The schematics of *C. crescentus*  $\sigma^{70}$  and  $\sigma^{32}$  show that both of them have a conserved  $\sigma_{1,2}$  and  $\sigma_2$ , ( $\sigma^{70}$ , orange;  $\sigma^{32}$ , blue) but a radically different non-conserved region ( $\sigma^{70}$ , yellow;  $\sigma^{32}$ , light blue). The gray shadow boxes on  $\sigma^{70}$  indicate GcrA-interacting regions. **(B)** The sequence alignment of *C. crescentus*  $\sigma^{70}$  and  $\sigma^{32}$  by Clustal Omega. Conserved residues, red boxes;  $\sigma^{70}$  residues contacting GcrA, green boxes; GcrA-interacting regions on  $\sigma^{70}$ , gray shadow boxes.

**Figure S4.** The GcrA-DBD/m<sup>6</sup>A-DNA structures. **(A)** The asymmetry unit of crystal form 1 contains four GcrA-DBD molecules and four dsDNA molecules.

Superimposition of four GcrA-DBD/DNA structures shows an identical interaction between GcrA-DBD and DNA (circle in the middle). **(B)** The asymmetry unit of crystal form 2 contains three GcrA-DBD molecules and one dsDNA. Molecule 1 of GcrA-DBD interacts with the major groove of dsDNA; molecule 2 of GcrA-DBD makes no interaction with dsDNA; and molecule 3 of GcrA-DBD makes non-specific interaction with the minor groove of dsDNA. **(C)** Superimposition of the complex structure from crystal form 1 (red) and the complex structure from crystal form 2 (cyan) suggests that the interaction between GcrA-DBD molecule 1 and DNA in crystal 2 is essentially the same as the interaction between GcrA-DBD and DNA in crystal form 1. **(D and E)** The 2Fo-Fc map contoured at  $2\sigma$  shows clear density for DNA and m<sup>6</sup>A on both strands. **(F)** Structure superimposition of *C. crescentus* GcrA-DBD (this study; cyan) and *T. aquaticus*  $\sigma^70_4$  (yellow; PDB: 1KU7). **(G)** Structure superimposition between *C. crescentus* GcrA-DBD/m<sup>6</sup>A-DNA (this study; cyan and gray) and *T. aquaticus*  $\sigma^70_4$ -35 element (yellow). **(H)** Sequence alignment between *C. crescentus* GcrA-DBD and  $\sigma^70_4$  from various bacterial species. Identical or similar residues, red; residues contacting DNA, green. **(I)** The western blot results of GcrA mutants in Figure 3G. **(J)** The western blot results of GcrA mutants in Figure 4D. The RNAP  $\alpha$  subunit (RpoA) was used as a loading control. Surface presentation of GcrA-DBD shows the pockets for methyl groups on '+' **(K)** or '-' **(L)** strand of unmethylated dsDNA. The colors are as in previous figures. **(M)** Superimposition of GcrA-DBD/m<sup>6</sup>A-DNA structure and GcrA-DBD/DNA structure (orange).

**Figure S5.** Structure models of GcrA-RPo complexes. **(A)** The GcrA-DBD at promoter region centered at -30 (middle) has no clash with RNAP, however GcrA-DBD centered at promoter region centered at -27 has potential clash with RNAP  $\beta$  subunit and GcrA-DBD at promoter region centered at -33 has potential clash with



$\sigma^{70}_4$  and RNAP  $\beta$  subunit. **(B)** The GcrA-DBD at promoter region centered at -20 (middle) has no clash with RNAP, however GcrA-DBD at promoter region centered at -18 has potential clash with  $\sigma^{70}_3$  and GcrA-DBD at promoter region centered at -22 has potential clash with  $\sigma^{70}_{\text{NCR}}$ . Blue arrows point to the potential clashes. **(C)** Structures models of GcrA-DBD at different locations of downstream promoter DNA suggest that GcrA-DBD is able to bind on a broad range of locations. The estimated distances between GcrA-DBD at various positions and GcrA-CTD bound on  $\sigma^{70}_2$  are listed. **(D)** The top panel shows the conserved basic patch at C-terminal domain of GcrA from an alignment of  $\sim 1000$  GcrA protein sequences, and the bottom panel shows that the C-terminal basic patch is physically close to the backbone of -10 element nontemplate ssDNA. The dash indicates a possible path for the C-terminal basic patch and potential interactions between K157/K158 with the phosphate of -8/-9 nucleotides.

## SUPPLEMENTAL FIGURES

### Supplemental figure 1

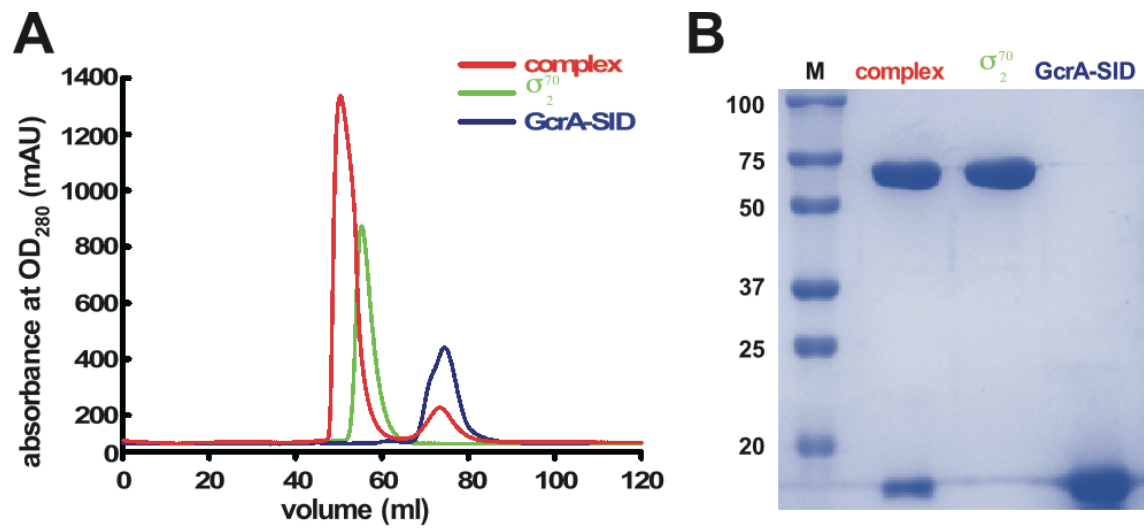

Supplemental figure 2

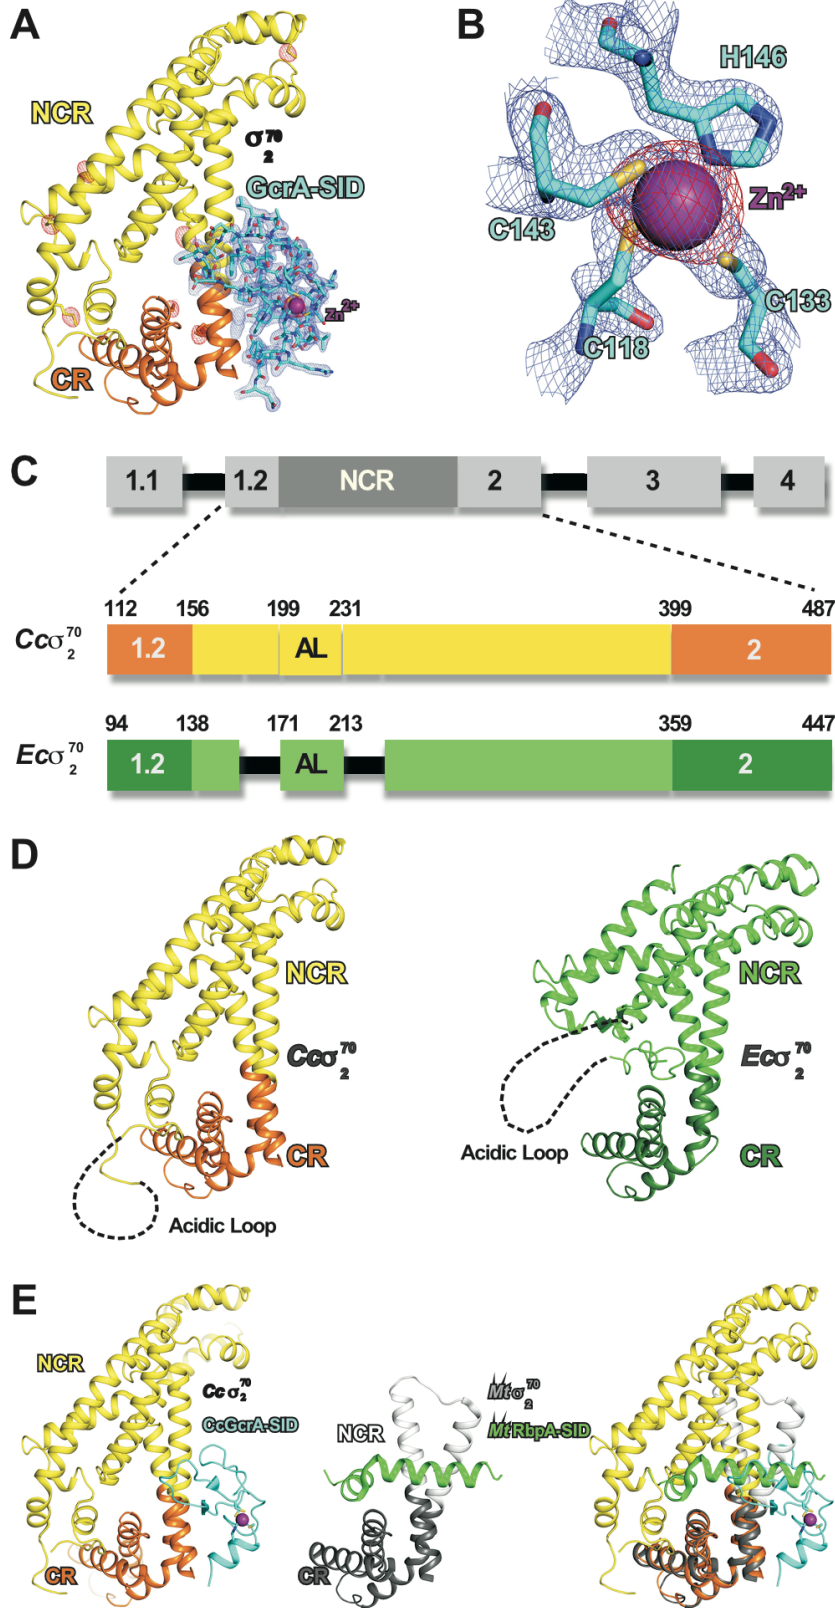

Supplemental figure 3

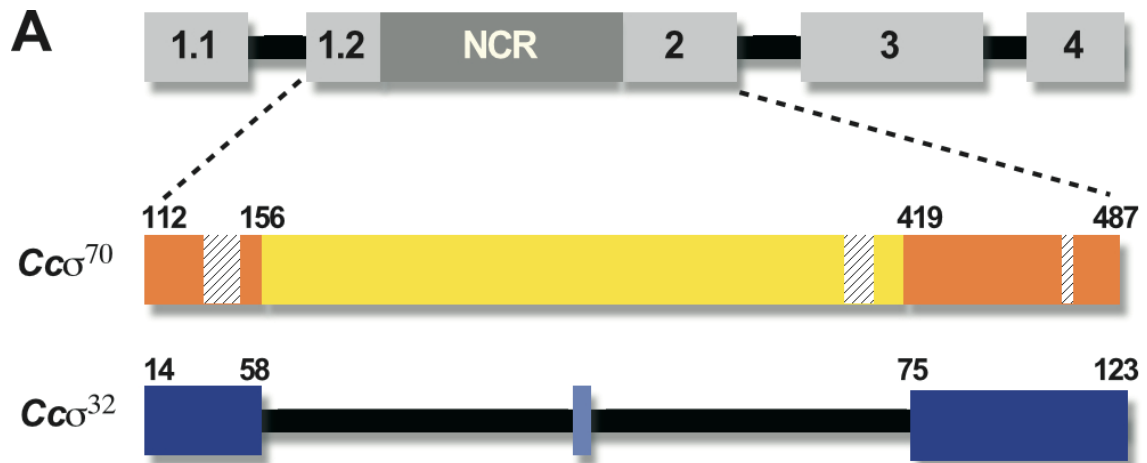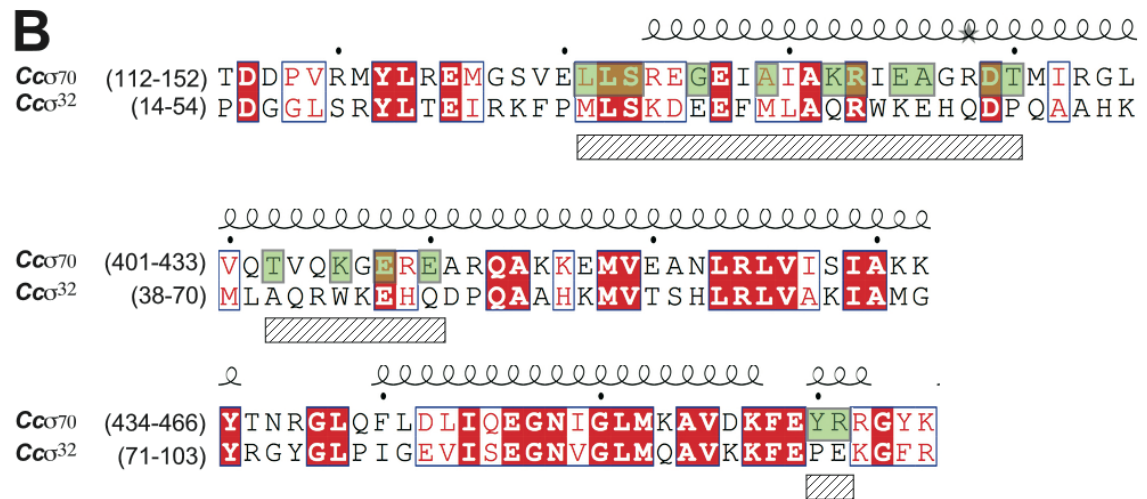

# Supplemental figure 4

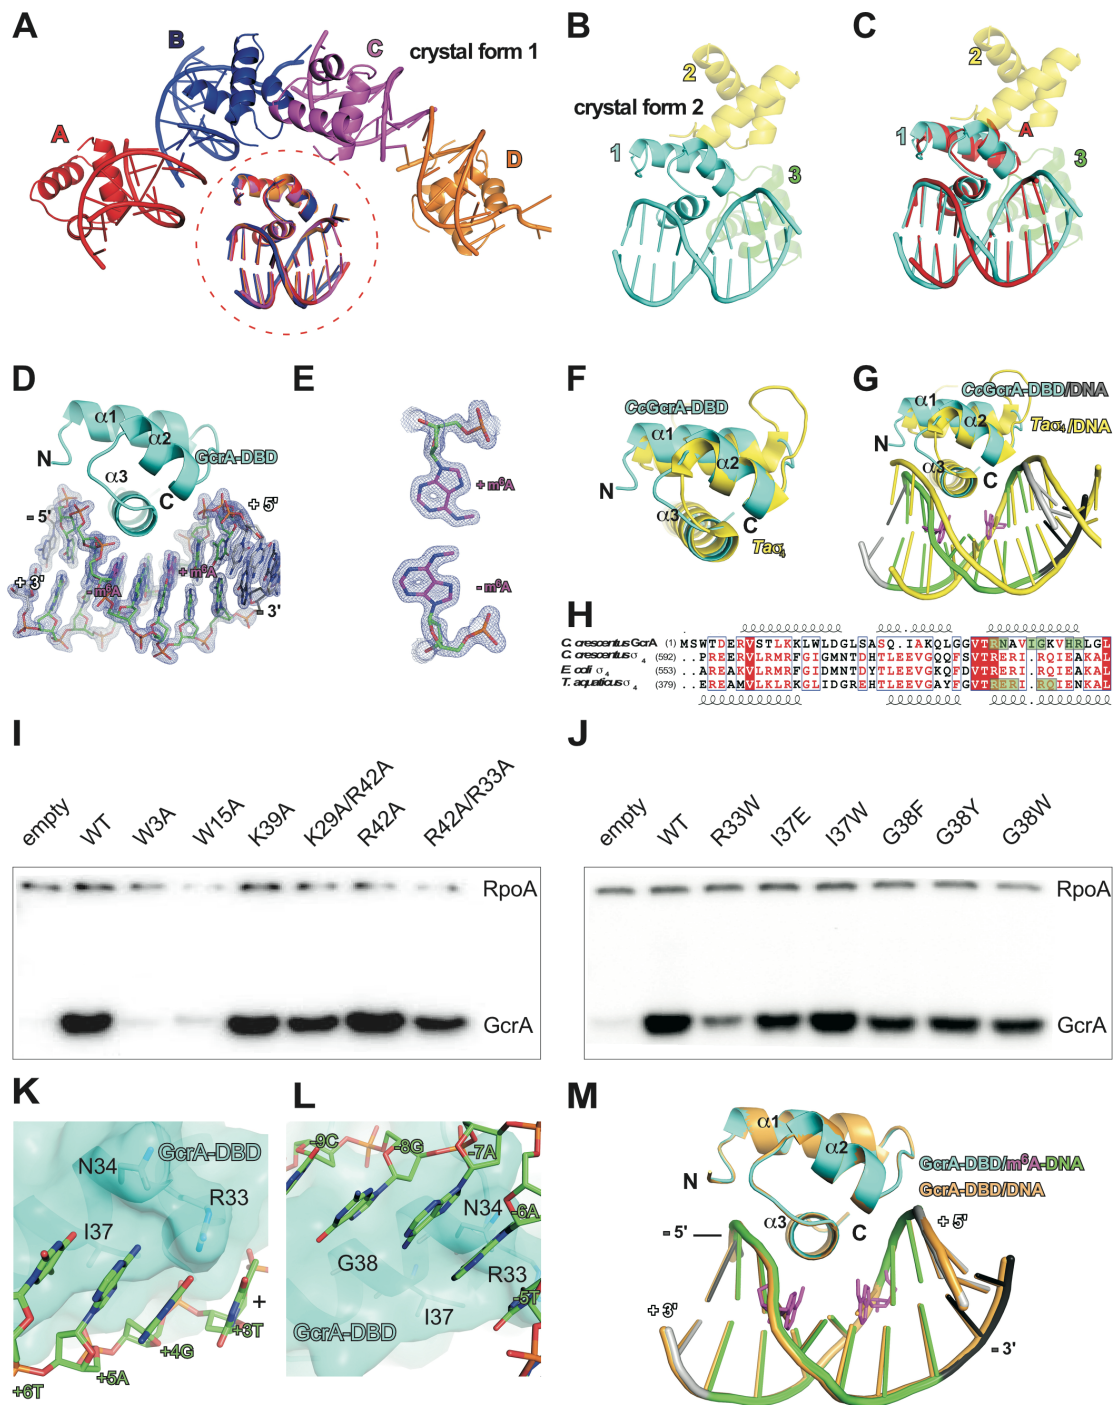

# Supplemental figure 5

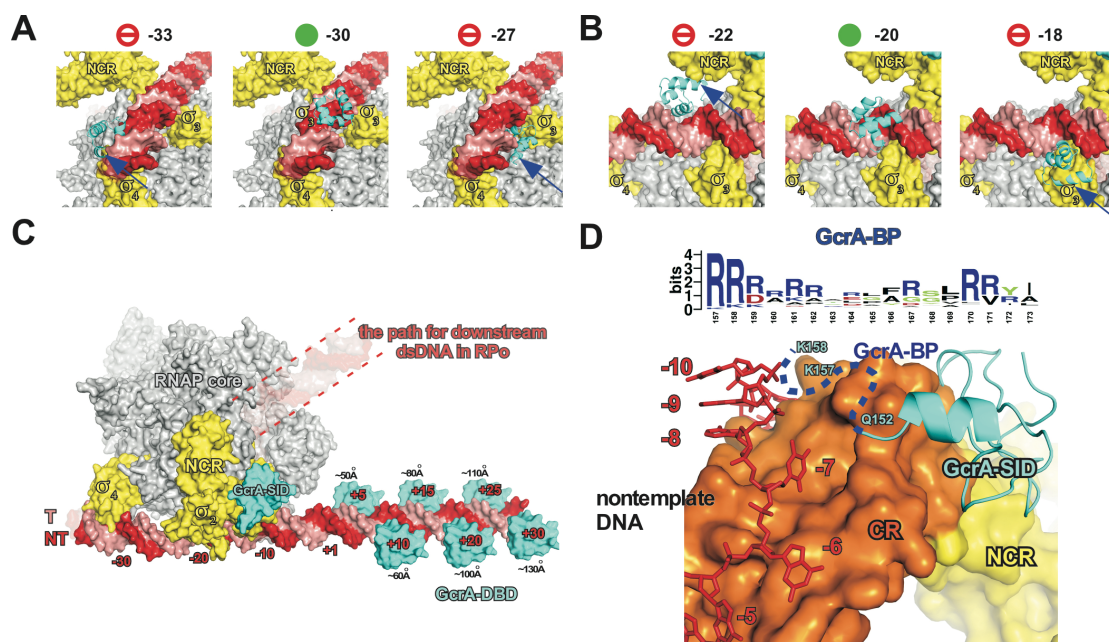

Supplement: gky161_supp.pdf [file gky161_supp.pdf]
